# Supplementary material for: Local protein dynamics during microvesicle exocytosis in neuroendocrine cells
Source: PubMed Central journal article supplement — Mol Biol Cell. 2018 Aug 1;29(15):1891–903. doi: 10.1091/mbc.E17-12-0716 (PMC6085826; doi:10.1091/mbc.e17-12-0716), 2018-08-01

# Supplemental Materials

*Molecular Biology of the Cell*

Somasundarama and Taraska

**Supplemental Figure 1.** Frequency of microvesicle fusion events, and radial spread of VACHT-pH following exocytosis, in PC12 cells. (A) Histogram showing number of fusion events before and after application of stimulation buffer (KCl). (B) Average normalized radial line scans of VACHT-pH during fusion. Contrast has been adjusted to show areas with lower intensity. Vertical dotted lines indicate the time-points corresponding to linescan intensity plots (Right). Standard errors are plotted as shaded areas around the average traces. Data was obtained from cells co-expressing VACHT-pH and farnesyl-mCherry. (C) Average time-lapse traces of normalized fluorescence intensities for VACHT-pHuji (magenta) and NPY-GFP (green). Individual event traces were time-aligned to 0 s, which corresponds to the fusion frame in the red channel. Standard errors are plotted as shaded areas around the average traces. (D) List of plasmids, sources of cDNA, and the number of events and cells analyzed for each protein. \*Truncated CMV promoter.

**Supplemental Figure 2.** Dynamics of Rab proteins during SLMV fusion. (A) Average normalized radial line scans of the Rab proteins during microvesicle exocytosis. Bar, 1  $\mu\text{m}$ . Vertical dotted lines indicate the time-points corresponding to linescan intensity plots (Right). Standard errors are plotted as shaded areas around the average traces.

**Supplemental Figure 3.** Dynamics of SNARE proteins during fusion. (A) Average normalized radial line scan analysis of SNAREs and control mCherry proteins during microvesicle exocytosis. Bar, 1  $\mu\text{m}$ . Vertical dotted lines indicate the time-points corresponding to linescan intensity plots (Right). Standard errors are plotted as shaded areas around the average traces.

**Supplemental Figure 4.** Synaptotagmin1 and Muncprotein behavior at SLMV fusion sites. (A-C) Average time-lapse traces of normalized fluorescence intensities for: (A) synaptotagmin1-mCherry (266 events, 5 cells), (B) mCherry-Munc18a (250 events, 11 cells), and (C) Munc13-mCherry (132 events, 5 cells). Individual event traces were time-aligned to 0 s (vertical black line), which corresponds to the fusion frame in the green channel. Standard errors are plotted as shaded areas around the average traces. \* $p \leq 0.05$ , ns – not significant, when compared with baseline.

**Supplemental Figure 5.** Dynamics of SNARE modulators during SLMV fusion. (A) Average normalized radial line scans of accessory proteins during microvesicle exocytosis. Bar, 1  $\mu\text{m}$ . Vertical dotted lines indicate the time-points corresponding to linescan intensity plots (Right). Standard errors are plotted as shaded areas around the average traces.

**Supplemental Figure 6.** Dynamics of WT and mutant amphiphysin1 and syndapin2, and diffusion of VACHT-pH, during SLMV fusion. (A) Average normalized radial line scans of WT and mutant amphiphysin1 and syndapin2 proteins during microvesicle exocytosis. Bar, 1  $\mu\text{m}$ . (B) Average normalized radial line scans of VACHT-pH during fusion in PC12 cells co-expressing syndapin2-BAR. Contrast has been adjusted to show areas with lower intensity. Vertical dotted lines indicate the time-points corresponding to linescan

intensity plots (Right). Standard errors are plotted as shaded areas around the average traces.

**Supplemental Figure 7.** Endophilins are localized at SLMV fusion sites during exocytosis. (A-C) (Left) Average time-lapse traces of normalized fluorescence intensities for: (A) endophilinA1-mCherry (258 events, 13 cells), (B) endophilinA2-mCherry (207 events, 11 cells), and (C) endophilinB1-mCherry (213 events, 11 cells). Individual event traces were time-aligned to 0 s (vertical black line), which corresponds to the fusion frame in the green channel. \* $p \leq 0.05$ , \*\* $p \leq 0.01$ , \*\*\* $p \leq 0.0001$ , ns – not significant, when compared with baseline. (Middle) Average normalized radial line scans of endophilins during fusion. Bar, 1  $\mu\text{m}$ . Vertical dotted lines indicate the time-points corresponding to linescan intensity plots (Right). Standard errors are plotted as shaded areas around the average traces.

**Supplemental Figure 8.** Effect of BAR domain proteins on loss of VACHT-pH from SLMV fusion sites. (A-D) Average time-lapse traces of normalized VACHT-pH fluorescence intensities in cells co-expressing VACHT-pH and the indicated BAR domain or control mCherry proteins. Individual traces were time-aligned to 0 s, which corresponds to the frame of fusion. Standard errors are plotted as shaded areas around the average traces.

**Supplemental Figure 9.** Effect of syndapin2 knock-down on VACHT-pH loss from fusion sites. (A) Western blots showing expression of syndapin2 in PC12 cells, that is reduced following treatment with siRNA. (Top) Blot probed with anti-syndapin2 antibody. (Bottom) Same blot re-probed with anti- $\alpha$ -actin. (B) Average time-lapse traces of normalized VACHT-pH fluorescence intensities in cells treated with control siRNA (219 events, 15 cells) or sisyndapin2 (184 events, 16 cells). Individual traces were time-aligned to 0 s, which corresponds to the fusion frame. Standard errors are plotted as shaded areas around the average traces.

**Supplemental Figure 10.** Recruitment of WT and mutant dynamin to SLMV fusion sites, and effect of BAR domain proteins and dynamin on VACHT decay. (A-F) (Left) Average time-lapse traces of normalized fluorescence intensities for: (A) Dynamin1-WT (250 events, 14 cells), (B) Dynamin-K44A (309 events, 12 cells), (C) Dynamin1- $\Delta$ Amph1 (365 events, 17 cells), (D) Dynamin1- $\Delta$ Synd2 (341 events, 17 cells), (E) Dynamin2-WT (260 events, 12 cells), and (F) Dynamin2- $\Delta$ PRD (252 events, 14 cells). Individual event traces were time-aligned to 0 s (vertical black line), which corresponds to the fusion frame in the green channel. \* $p \leq 0.05$ , \*\* $p \leq 0.01$ , \*\*\* $p \leq 0.0001$ , ns – not significant, when compared with baseline. (Middle) Average normalized radial line scans of WT and mutant dynamin proteins during microvesicle exocytosis. Bar, 1  $\mu\text{m}$ . Vertical dotted lines indicate the time-points corresponding to linescan intensity plots (Right). Standard errors are plotted as shaded areas around the average traces. (G) Single exponential decay constants for VACHT-pH when co-expressed with the indicated constructs, or treated with the indicated siRNA.

**Supplemental Figure 11.** Dynamics of other endocytic proteins at SLMV fusion sites. (A-D) (Left) Average time-lapse traces of normalized fluorescence intensities for: (A) N-WASP-mCherry (197 events, 8 cells), (B) ClathrinLC-mCherry (209 events, 5 cells), (C) AP2- $\mu$ 2-mCherry (153 events, 5 cells), and (D) mCherry-Intersectin (122 events, 5 cells). Individual event traces were time-aligned to 0 s (vertical black line), which corresponds to the fusion frame in the green channel. \* $p \leq 0.05$ , \*\* $p \leq 0.01$ , ns – not significant, when compared with baseline. (Middle) Average normalized radial line scan analysis. Bar, 1  $\mu$ m. Vertical dotted lines indicate the time-points corresponding to linescan intensity plots (Right). Standard errors are plotted as shaded areas around the average traces.

**Supplemental Figure 12.** Plasma membrane recruitment of amphiphysin1 following stimulation. (A) Images of a PC12 cell expressing VAcHT-pH (top) and Amph1-mCherry (bottom) at indicated time-points, with '0 s' being the start of the experiment. Stimulation buffer (KCl) was applied from ~ 20 s to 60 s. Bar, 5  $\mu$ m. (B) Time-lapse traces show background-subtracted and normalized mean fluorescence intensities for VAcHT-pH (green) and amphiphysin1-mCherry (magenta) from a region around the whole cell.

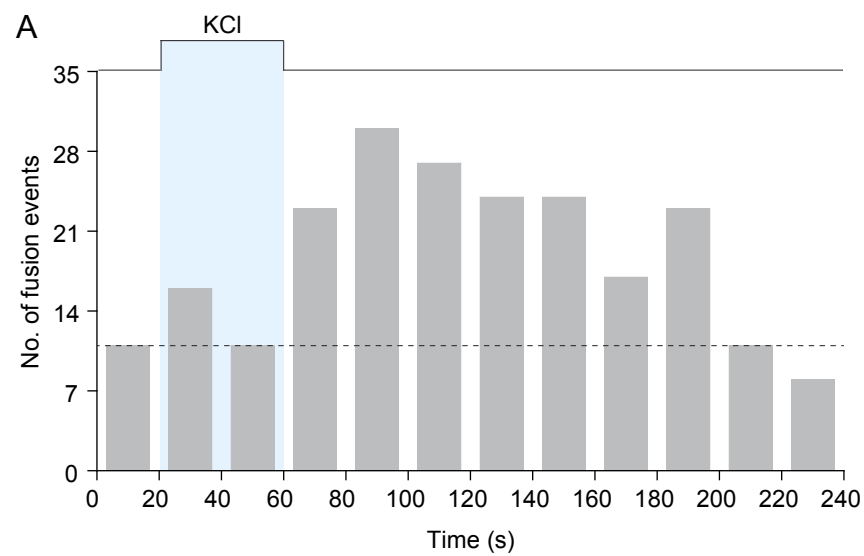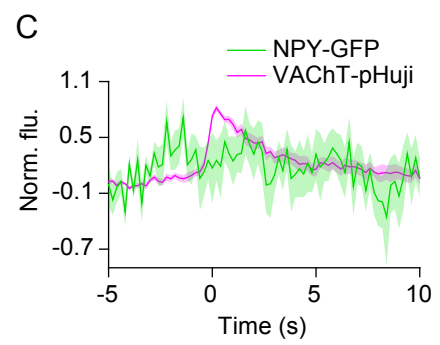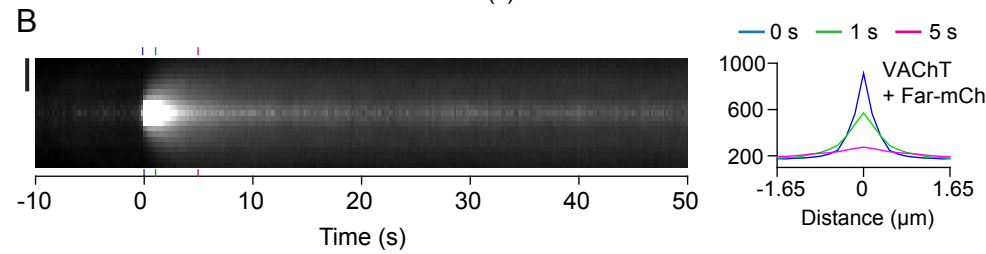

**D**

| DNA Construct                      | No. of Events | No. of Cells | Source of cDNA                |
|------------------------------------|---------------|--------------|-------------------------------|
| VAcHT-pHluorin                     |               |              | D. Clapham (Janelia)          |
| dCMV-mCherry-Syntaxin1a*           | 76            | 4            | W. Almers (OHSU)              |
| dCMV-mCherry-SNAP25*               | 97            | 8            | J. Taraska (NHLBI/NIH)        |
| VAMP2-mCherry                      | 172           | 7            | R. Scheller (Stanford U.)     |
| mCherry                            | 274           | 8            | Clontech                      |
| Farnesyl-mCherry                   | 166           | 9            | J. Taraska (NHLBI/NIH)        |
| Complexin2-mCherry                 | 202           | 7            | Biobasic synthesis            |
| CAPS-mKate2                        | 232           | 5            | T. Martin (UW, Madison)       |
| mCherry-Tomosyn                    | 289           | 9            | Biobasic synthesis            |
| NSF-mCherry                        | 274           | 5            | P. Hanson (Wash U.)           |
| Synaptotagmin1-mCherry             | 266           | 5            | J. Taraska (NHLBI/NIH)        |
| mCherry-Munc18a                    | 250           | 11           | Biobasic synthesis            |
| Munc13-mCherry                     | 132           | 5            | Biobasic synthesis            |
| mCherry-Rab27A                     | 103           | 4            | W. Westbroek (NIH)            |
| mRFP-Rab3A                         | 196           | 5            | M. Fukuda (Tohoku U.)         |
| mCherry-Rabphilin3A                | 198           | 6            | I. Macara (Vanderbilt U.)     |
| mCherry-Rab5A                      | 276           | 6            | C. Merrifield (Addgene 27681) |
| mCherry-Rab27B                     | 73            | 3            | J. Taraska (NHLBI/NIH)        |
| Amphiphysin1-mCherry               | 371           | 9            | C. Merrifield (Addgene 27692) |
| Amphiphysin1- $\Delta$ BAR-mCherry | 169           | 4            | J. Taraska (NHLBI/NIH)        |
| Amphiphysin1- $\Delta$ SH3-mCherry | 214           | 13           | J. Taraska (NHLBI/NIH)        |
| Amphiphysin1-SH3-mCherry           | 117           | 8            | J. Taraska (NHLBI/NIH)        |
| mCherry-Syndapin2                  | 228           | 6            | C. Merrifield (Addgene 27681) |
| mCherry-Syndapin2- $\Delta$ BAR    | 136           | 11           | J. Taraska (NHLBI/NIH)        |
| mCherry-Syndapin2-BAR              | 418           | 13           | J. Taraska (NHLBI/NIH)        |
| mCherry-Syndapin2- $\Delta$ SH3    | 184           | 9            | J. Taraska (NHLBI/NIH)        |
| EndophilinA1-mCherry               | 258           | 13           | DNASU HsCD00000899            |
| EndophilinA2-mCherry               | 207           | 11           | DNASU HsCD00005501            |
| EndophilinB1-mCherry               | 213           | 11           | DNASU HsCD00042012            |
| Dynamin1-mCherry                   | 250           | 14           | C. Merrifield (Addgene 27697) |
| Dynamin1-K44A-mCherry              | 309           | 12           | J. Taraska (NHLBI/NIH)        |
| Dynamin1-833-838A-mCherry          | 365           | 17           | J. Taraska (NHLBI/NIH)        |
| Dynamin1-S774E/S778E-mCherry       | 341           | 17           | J. Taraska (NHLBI/NIH)        |
| Dynamin2-mCherry                   | 260           | 12           | C. Merrifield (Addgene 27689) |
| Dynamin2- $\Delta$ PRD-mCherry     | 252           | 14           | J. Taraska (NHLBI/NIH)        |
| mCherry-N-WASP                     | 197           | 8            | H. Yamada (Okayama U.)        |
| AP2- $\mu$ 2-mCherry               | 153           | 5            | C. Merrifield (Addgene 27672) |
| mCherry-Intersectin                | 122           | 5            | Peter McPherson (McGill U.)   |
| Clathrin Light Chain-mCherry       | 209           | 5            | W. Almers (OHSU)              |
| Total                              | 8249          | 324          |                               |
| Average                            | 217.08        | 8.53         |                               |

A

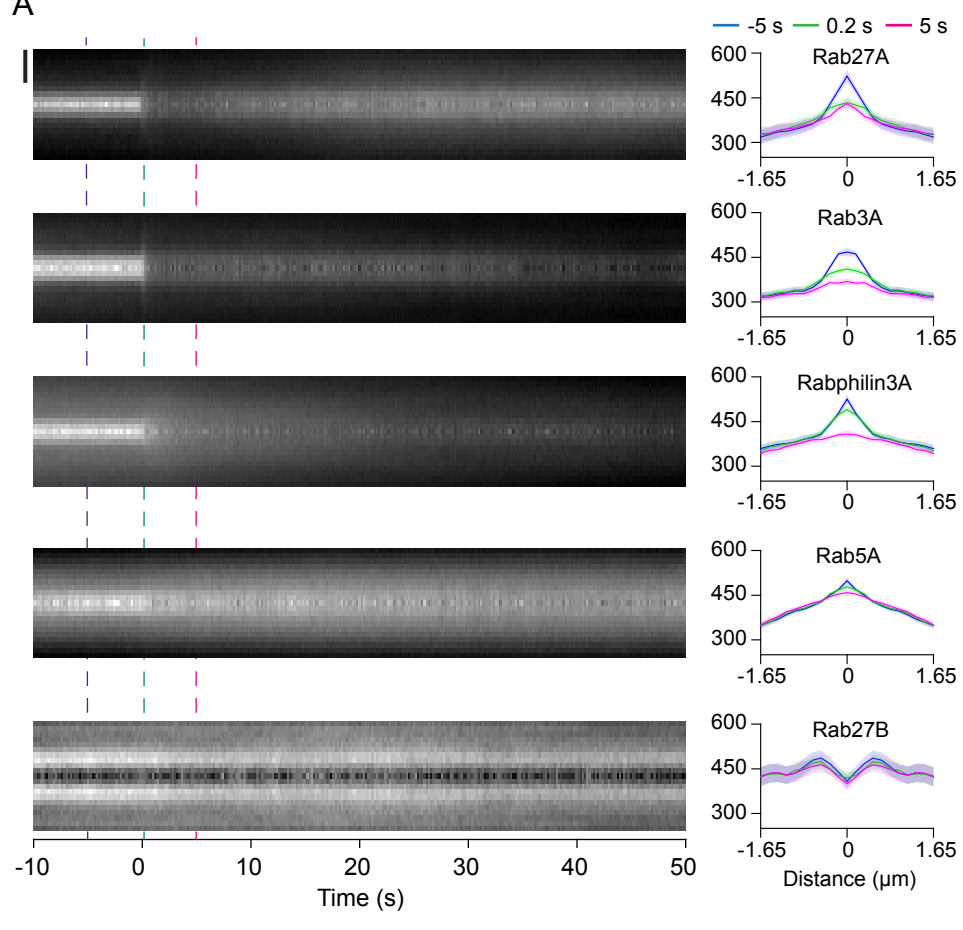

A

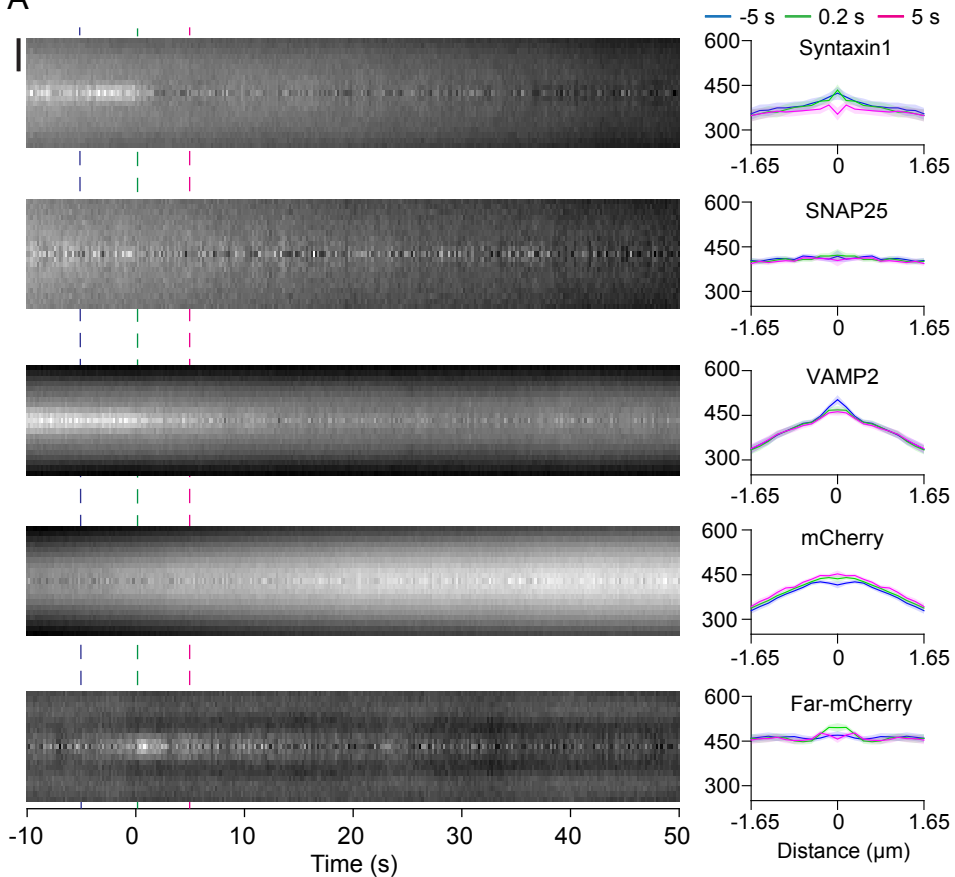

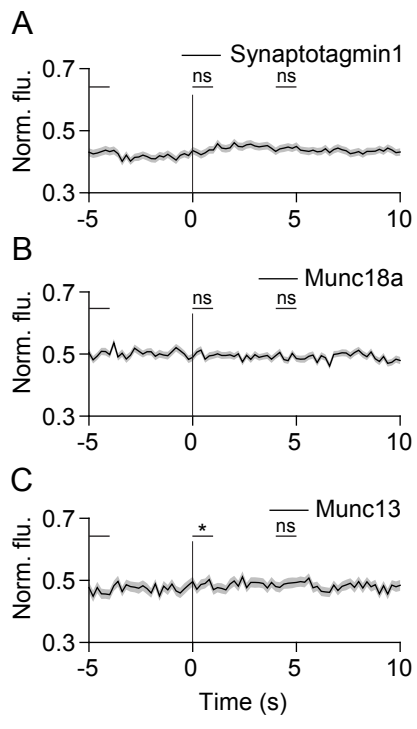



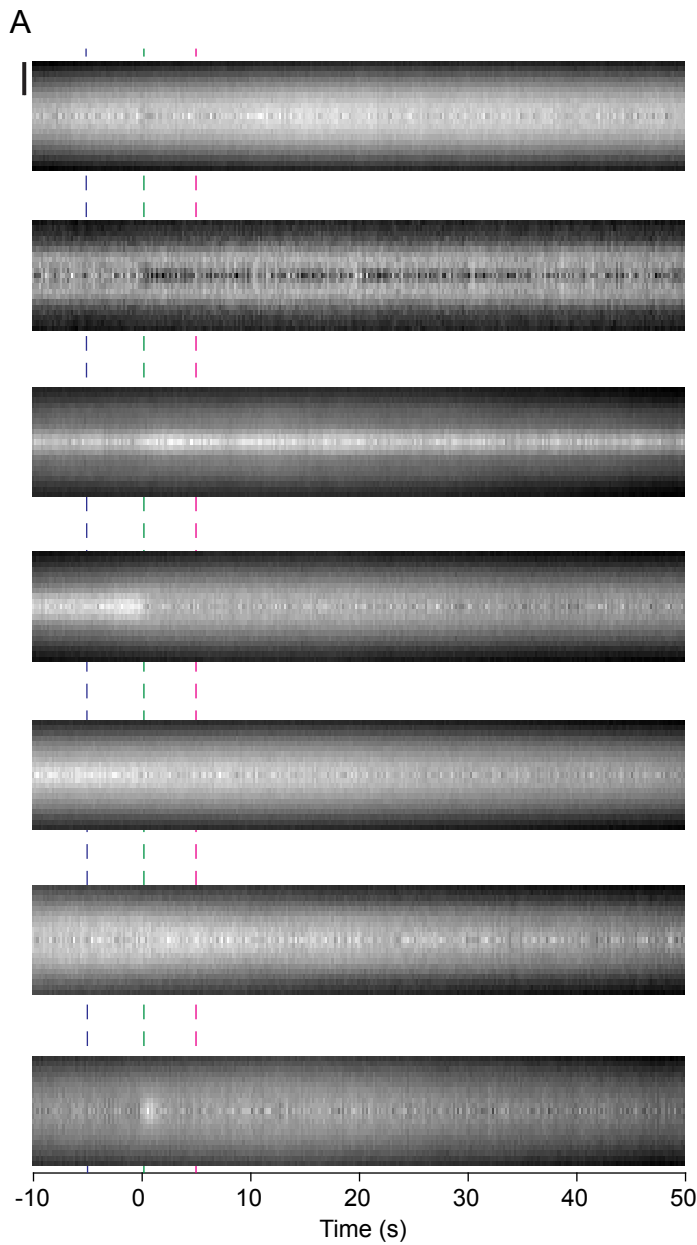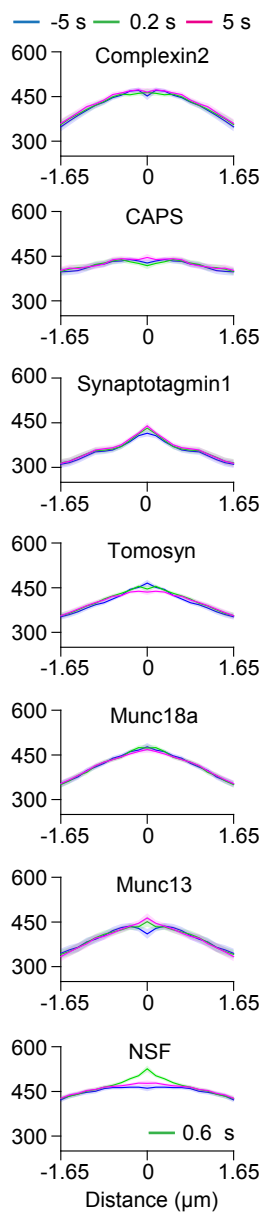

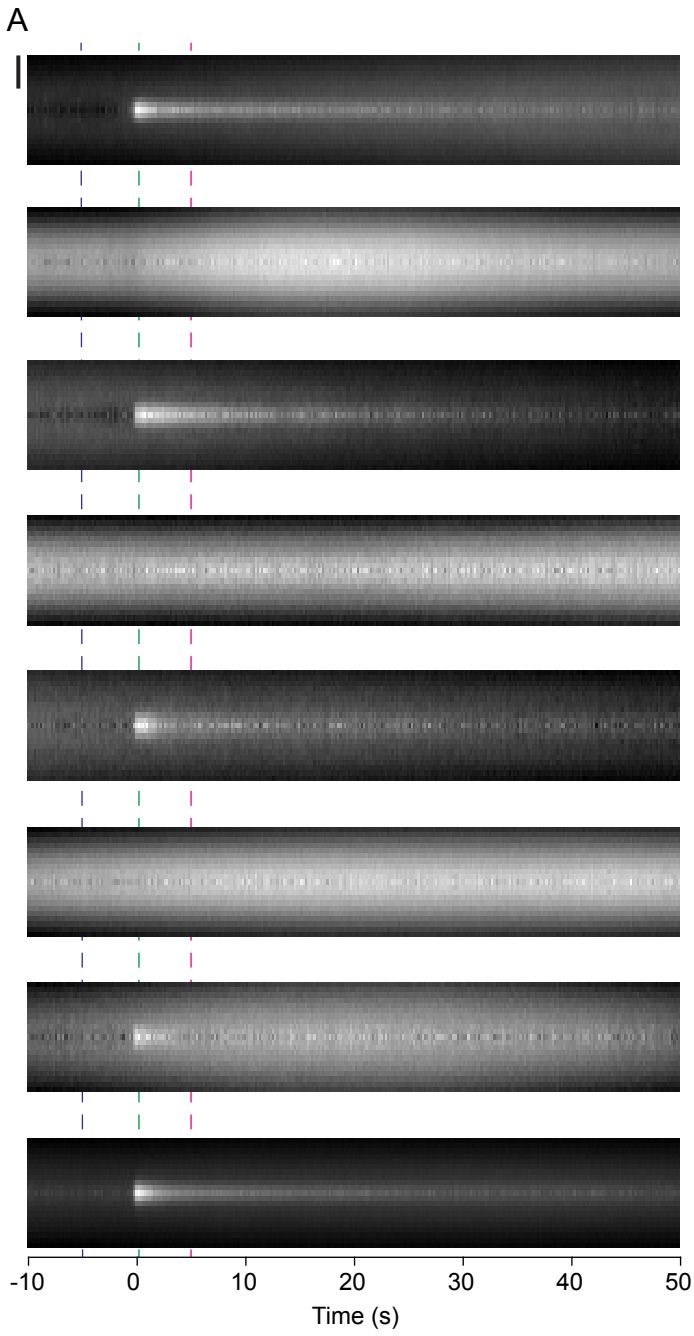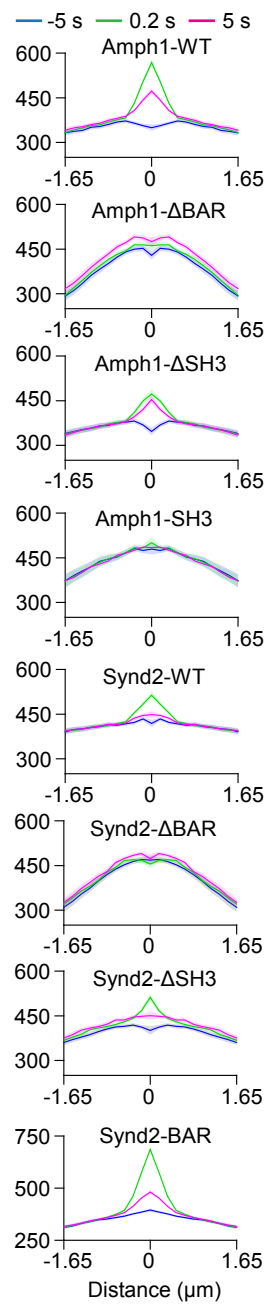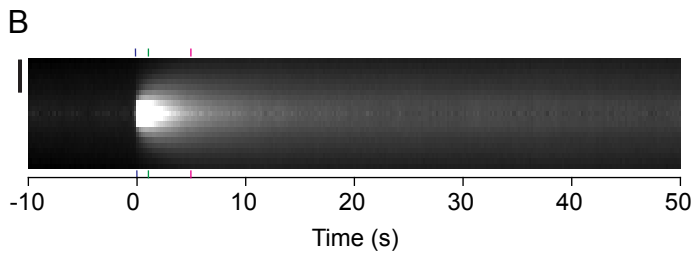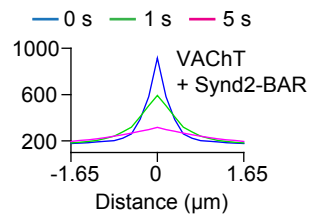

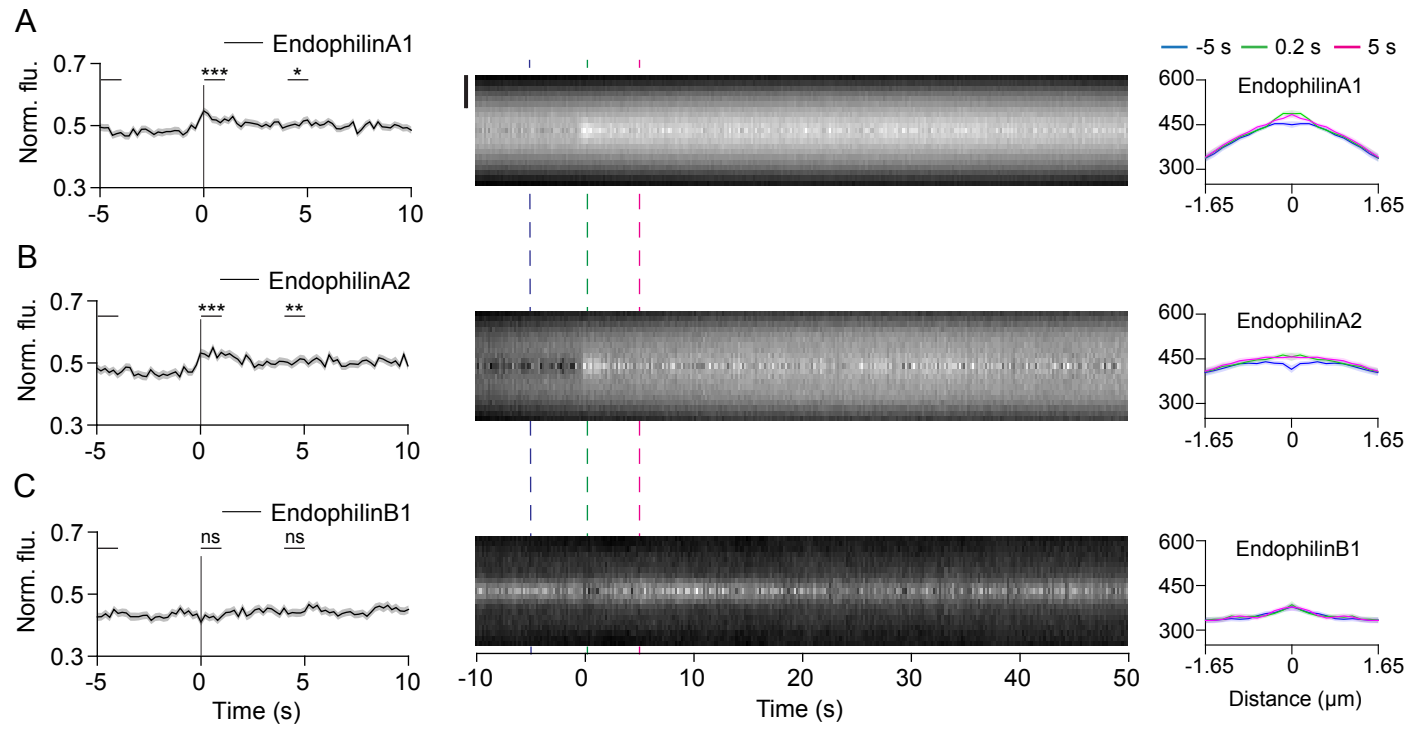

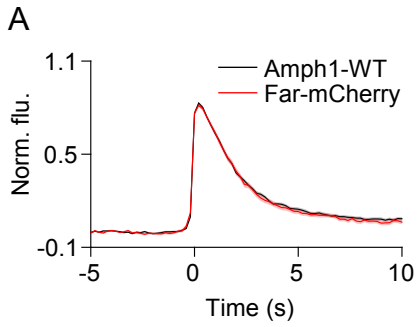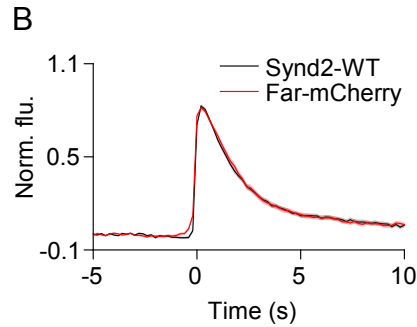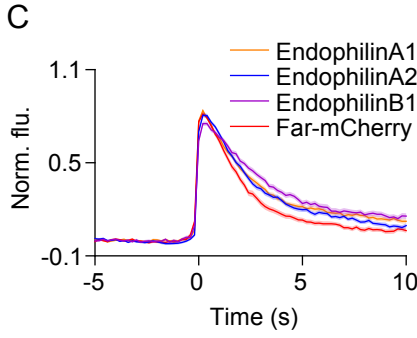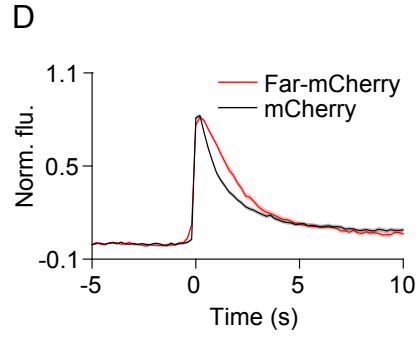

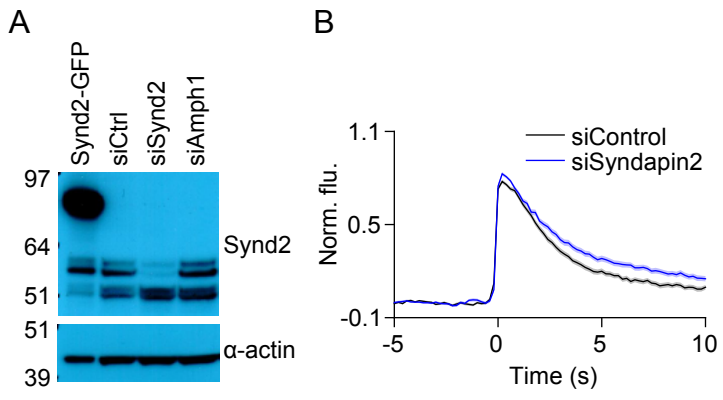

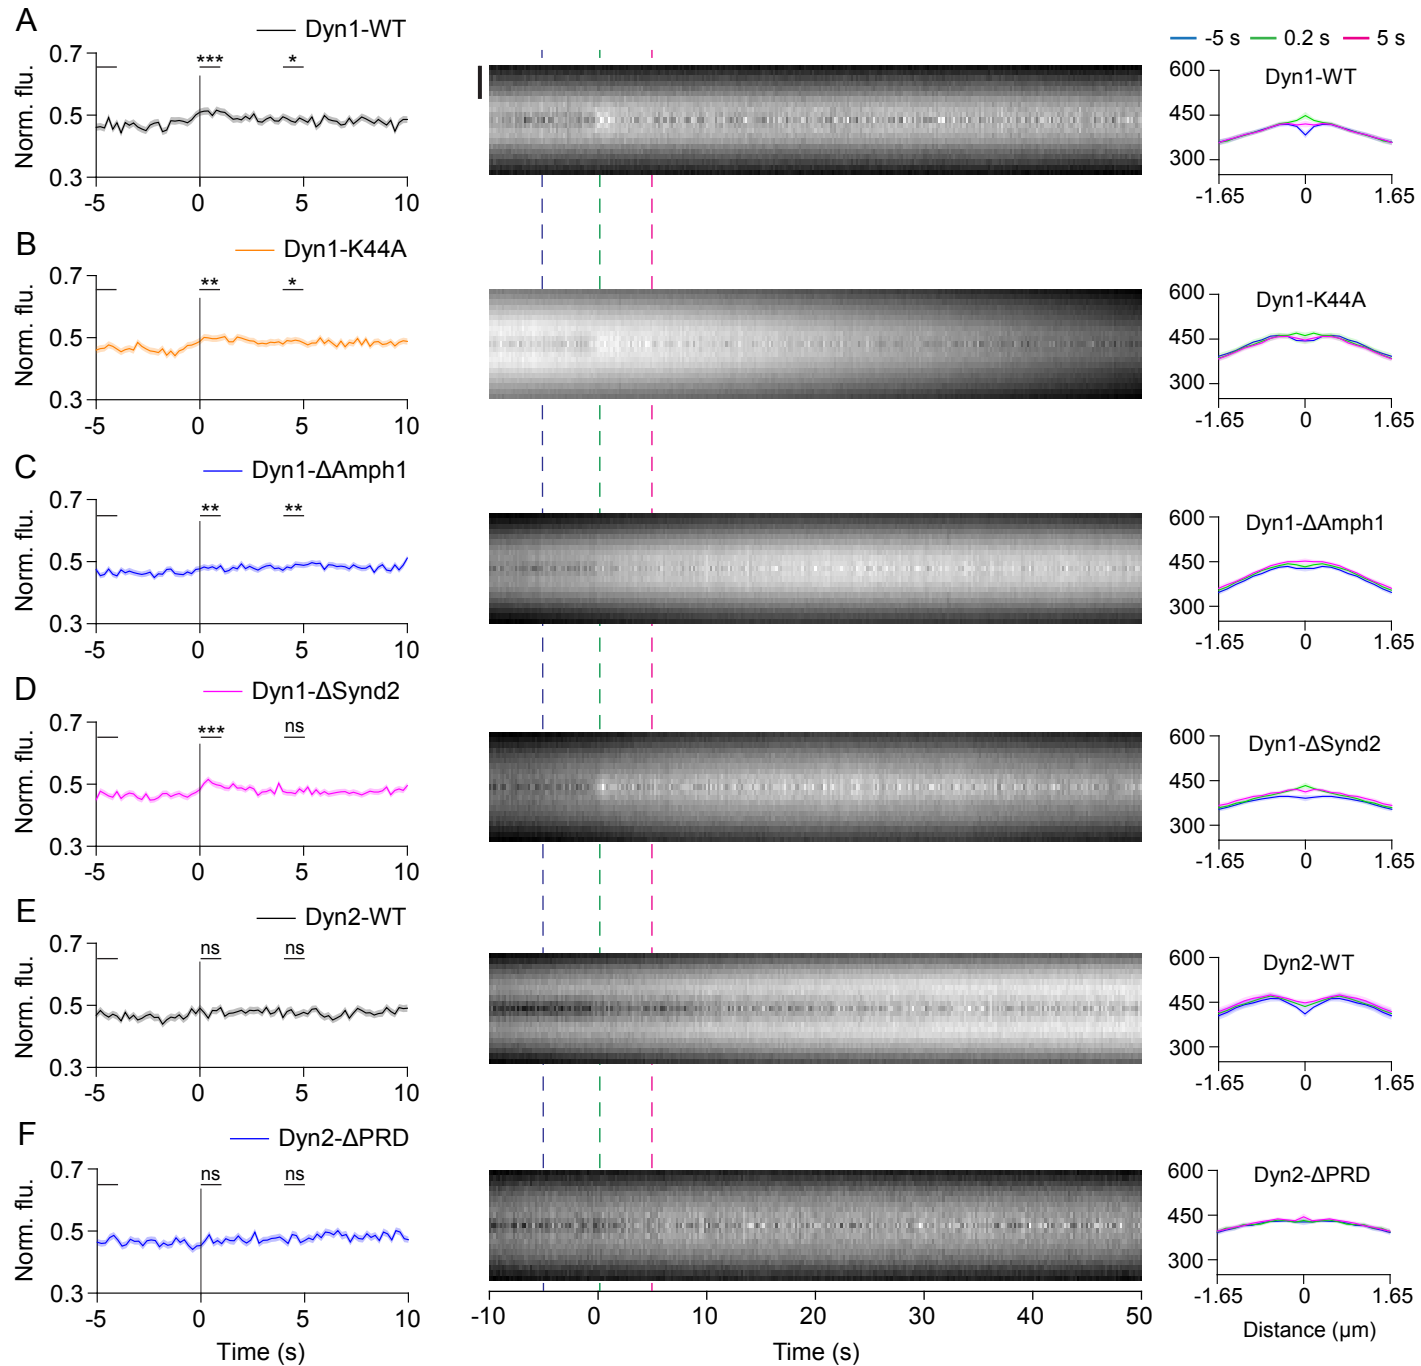

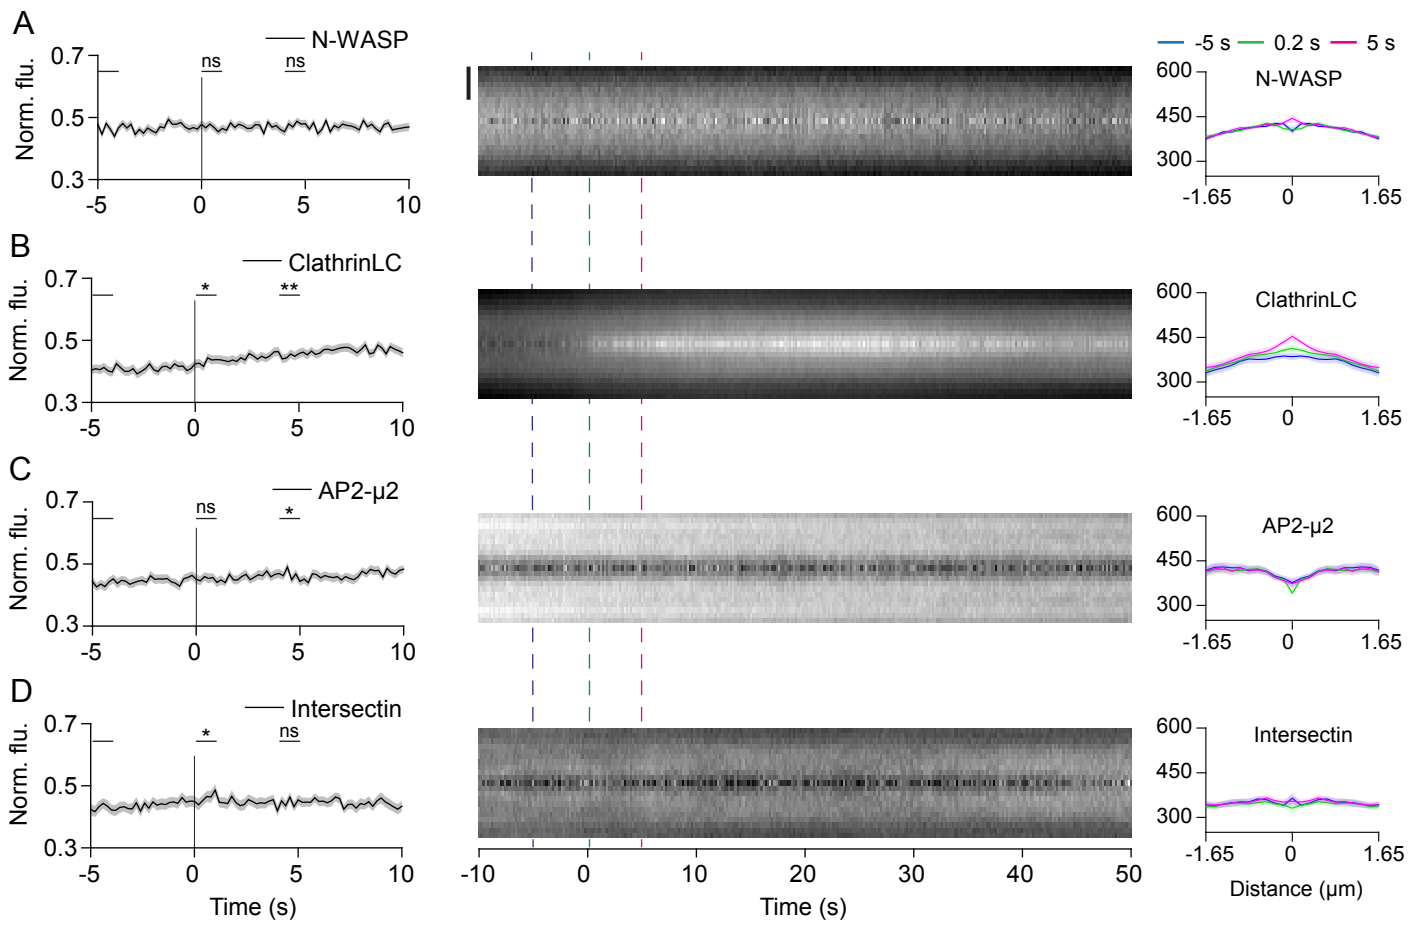

**A**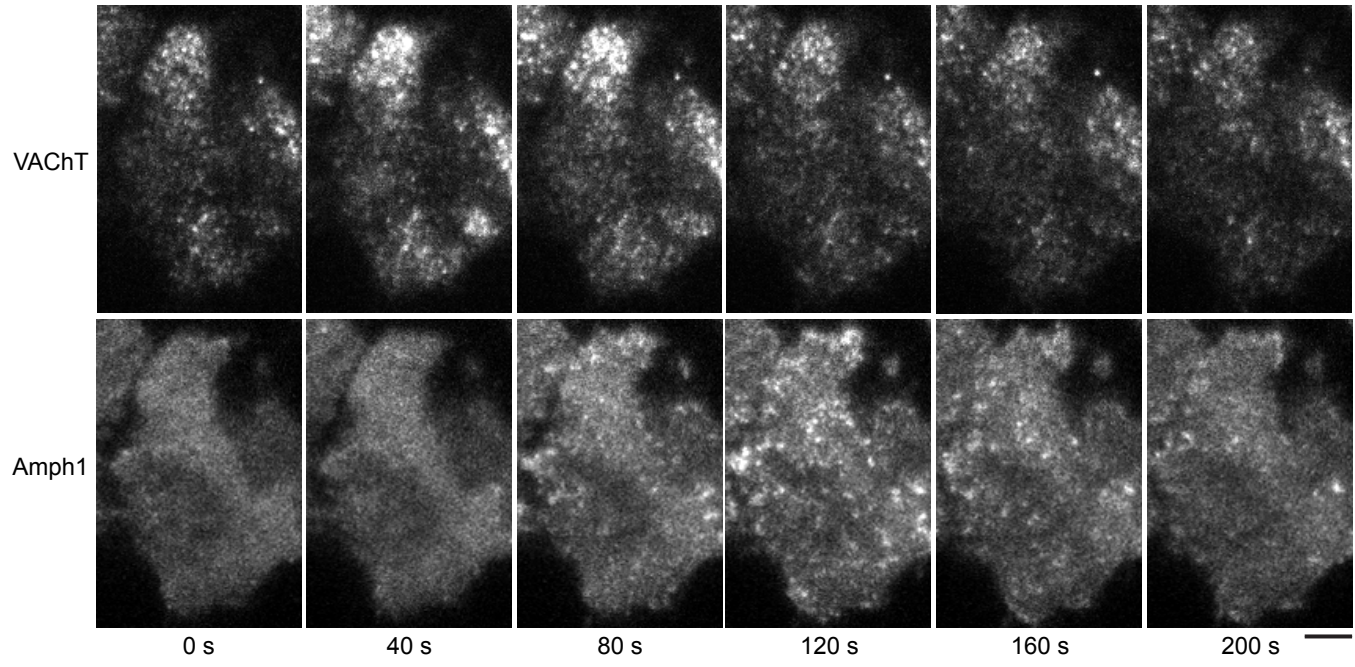**B**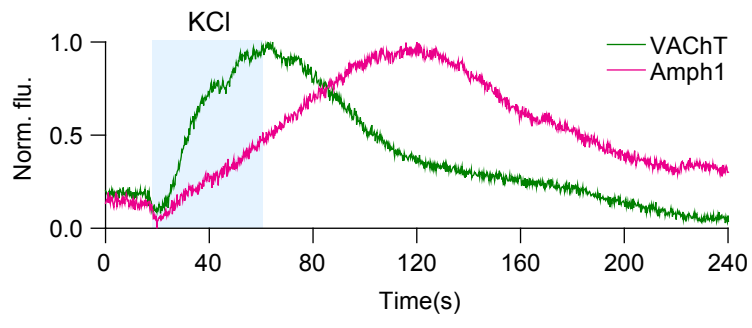

Supplement: mbc-29-1891-s001.pdf [file mbc-29-1891-s001.pdf]
